# Supplementary material
Source: PubMed Central journal article supplement (PMC3814521)
Supplement: mmc1.pdf [file mmc1.pdf]

A. miR-210 quantification in EVT<sub>s</sub> transfected with the indicated miRNAs

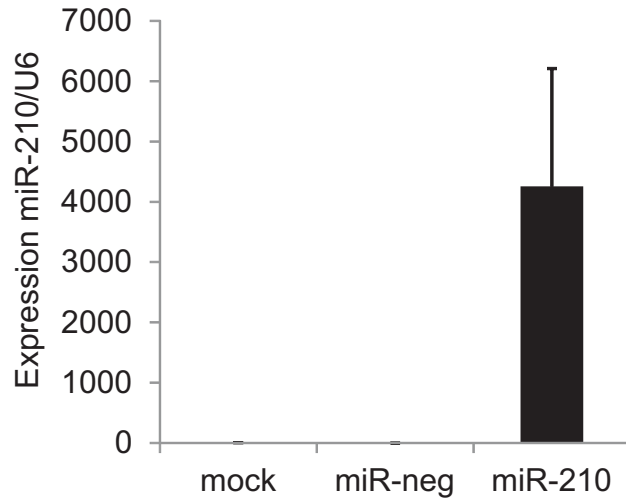

B. EVT<sub>s</sub> transfected with fluorescently labeled siRNA/morpholino

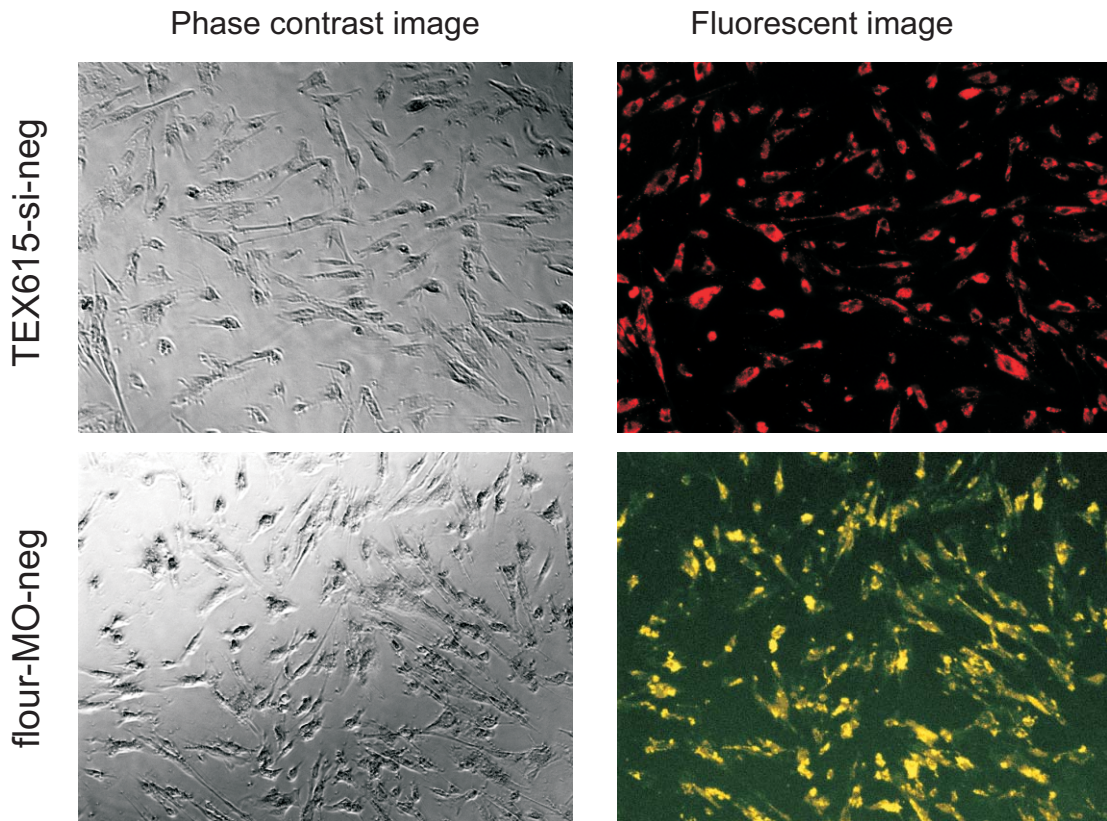

Supplemental Figure 1
