# Supplementary material
Source: PubMed Central journal article supplement (PMC3814521)

Experiment #1

Experiment #2

mock

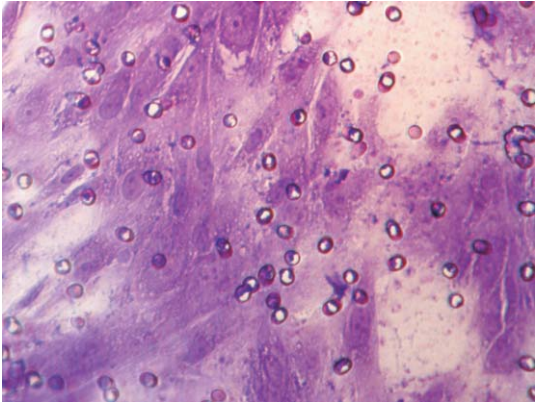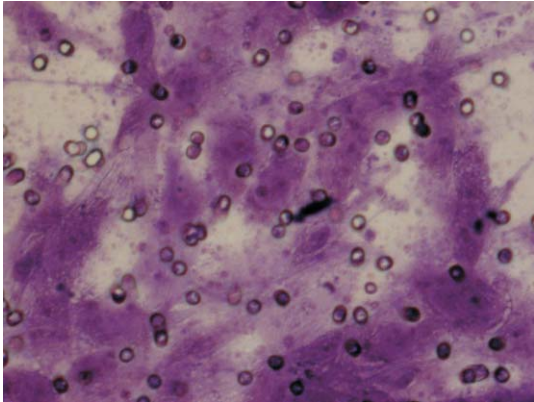

miR-neg

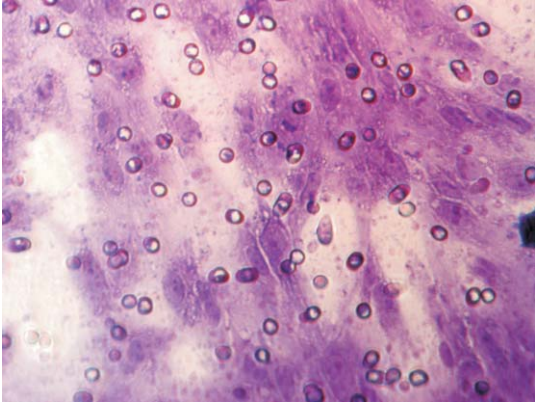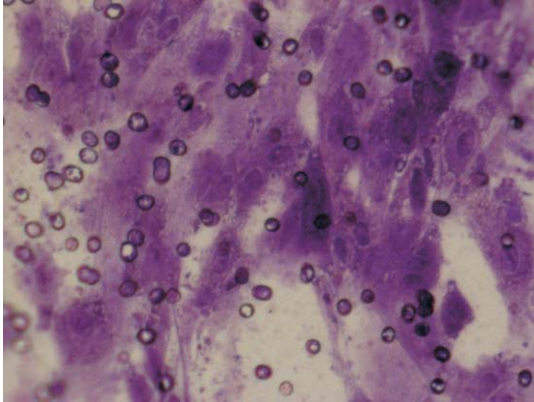

miR-210

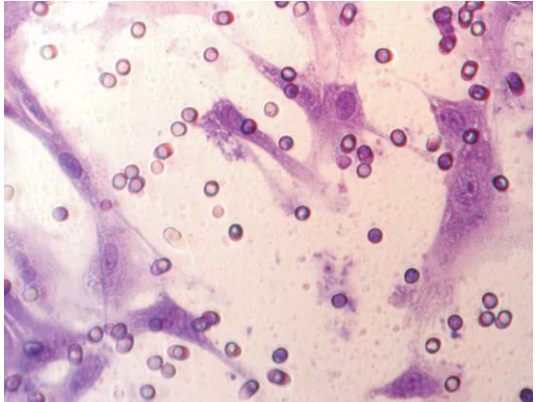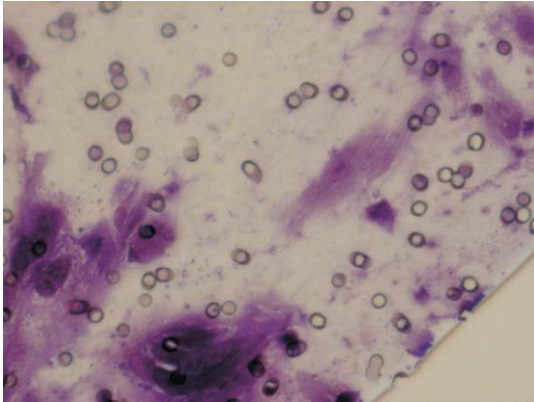

Supplemental Figure 2

Supplement: mmc2.pdf [file mmc2.pdf]

mock

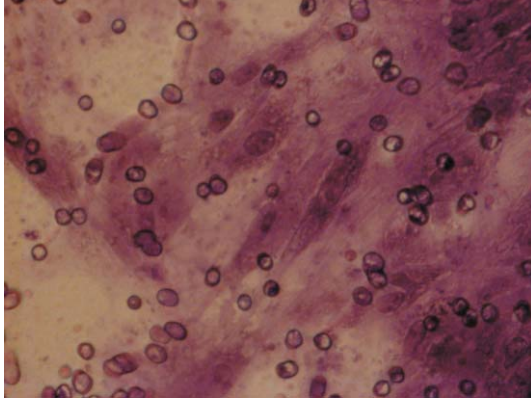

MO-neg

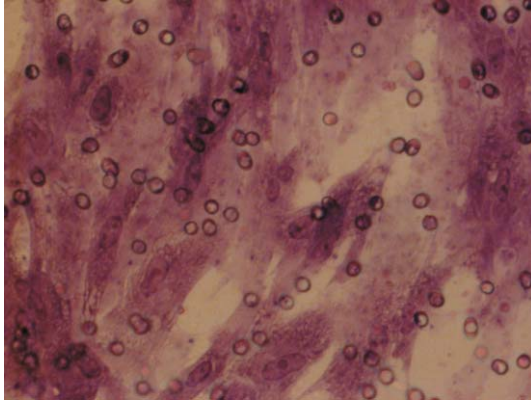

MO-210

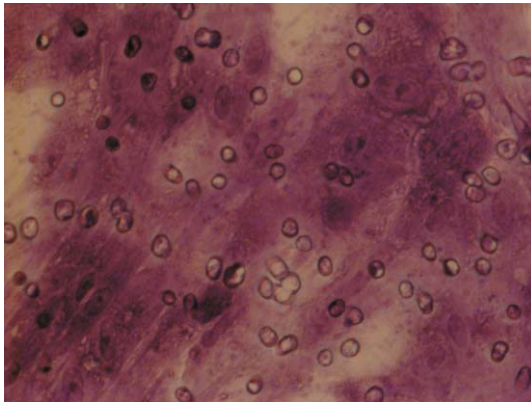

Supplemental Figure 3

Supplement: mmc3.pdf [file mmc3.pdf]

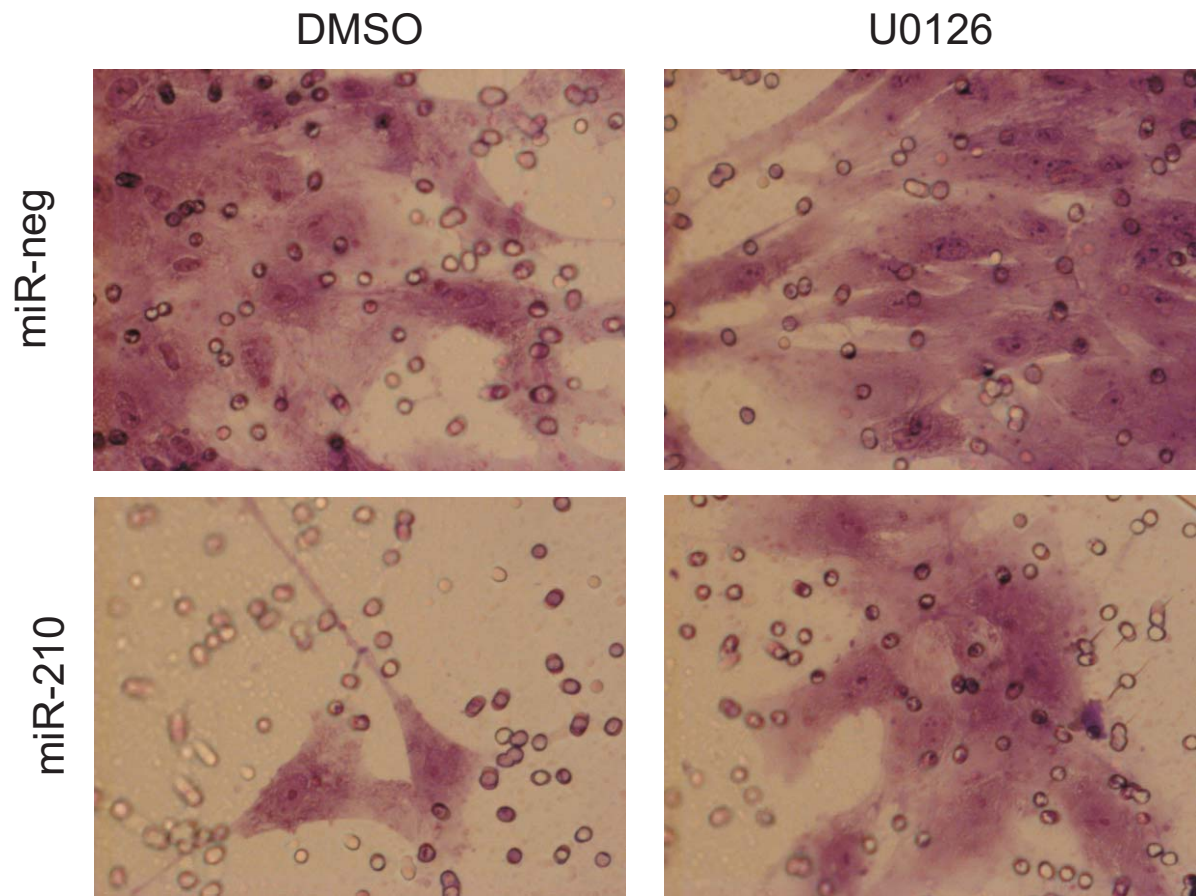

Supplemental Figure 4

Supplement: mmc4.pdf [file mmc4.pdf]
